# Supplementary material for: Circulating Exosomal MicroRNA-1307-5p as a Predictor for Metastasis in Patients with Hepatocellular Carcinoma
Source: PubMed Central journal article supplement (PMC7766543; doi:10.3390/cancers12123819), 2020-12-18
Supplement: cancers-12-03819-s001.pdf [file cancers-12-03819-s001.pdf]

Supplementary Materials

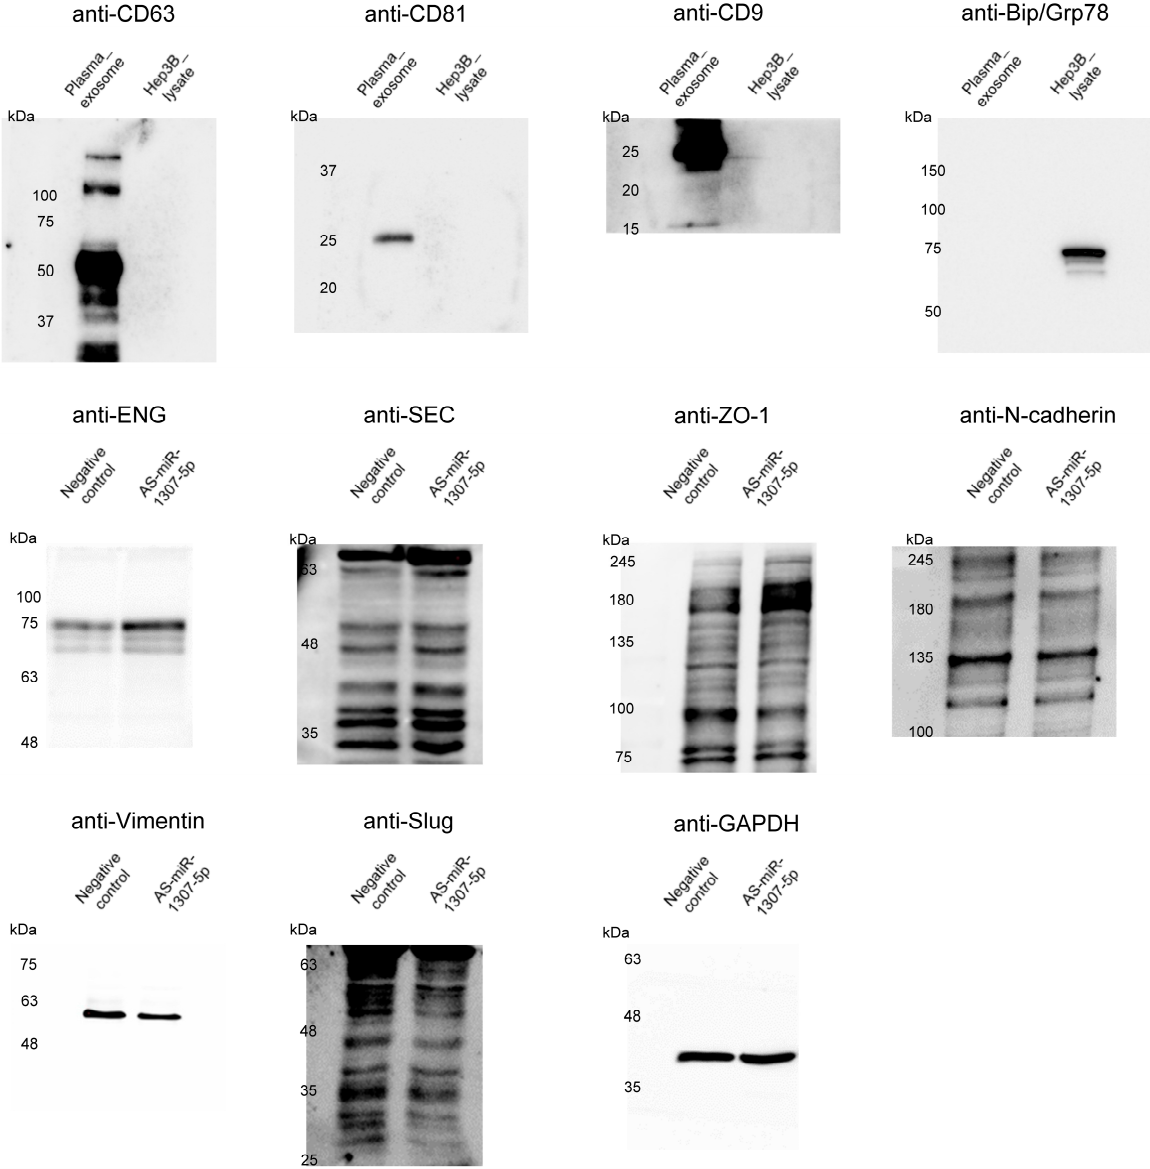

**Figure S1.** The whole blot (uncropped blots) showing all the bands with all molecular weight markers.

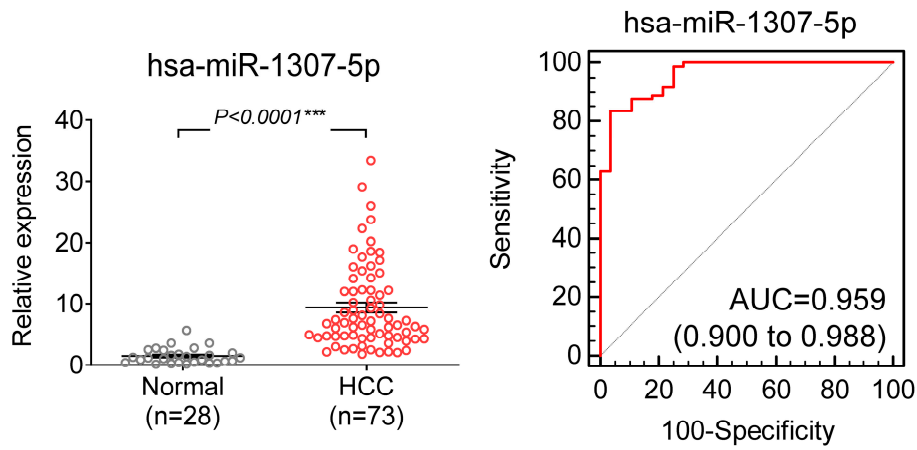

**Figure S2.** Serum exo-miR-1307-5p expression and ROC curves in normal healthy controls and the patients with HCC.

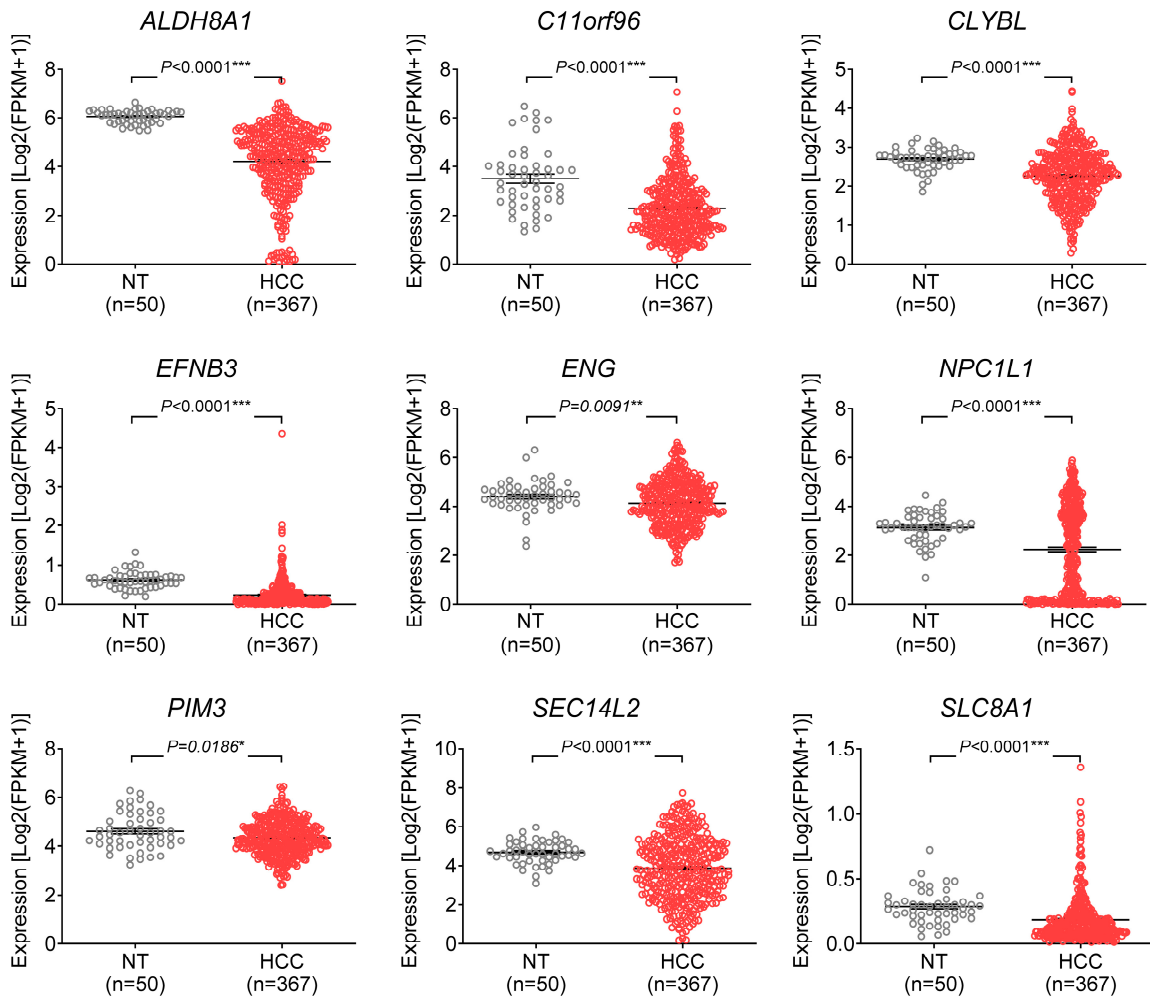

**Figure S3.** Expression of the nine target gene candidates of miR-1307-5p in The Cancer Genomic Atlas Liver Hepatocellular Carcinoma (TCGA\_LIHC).

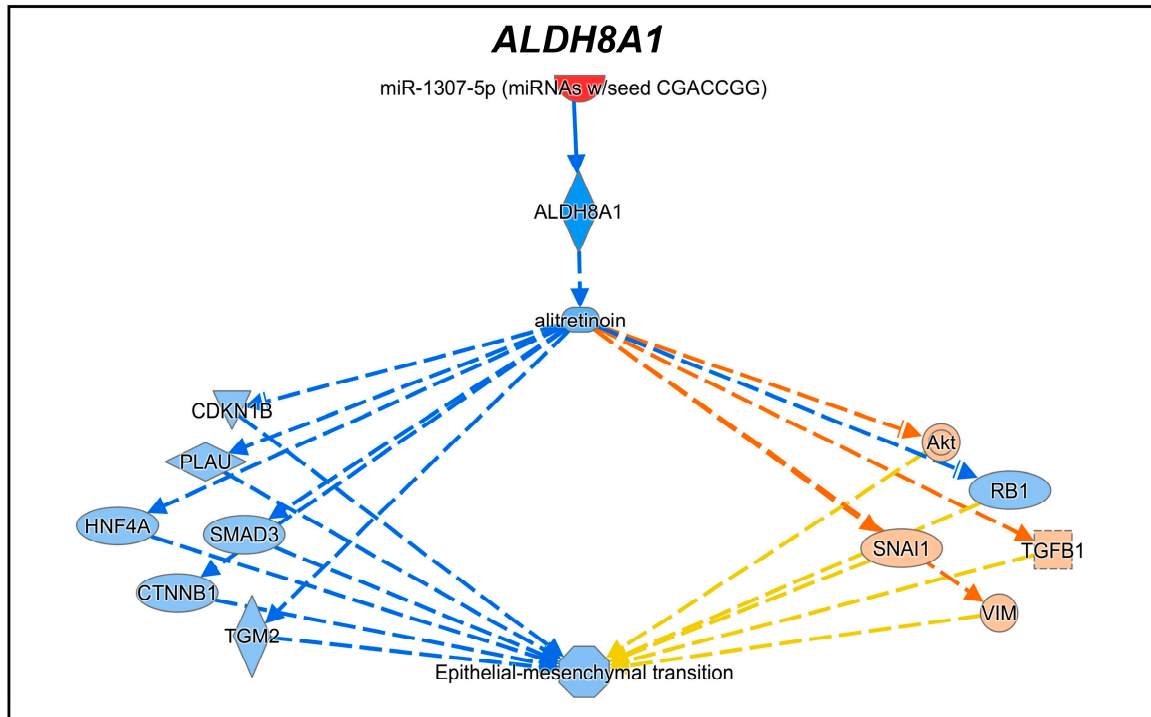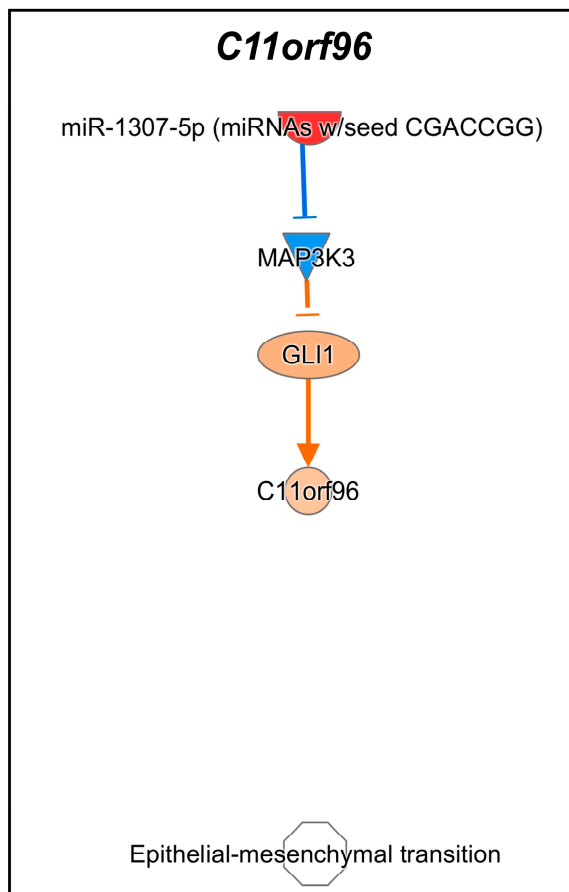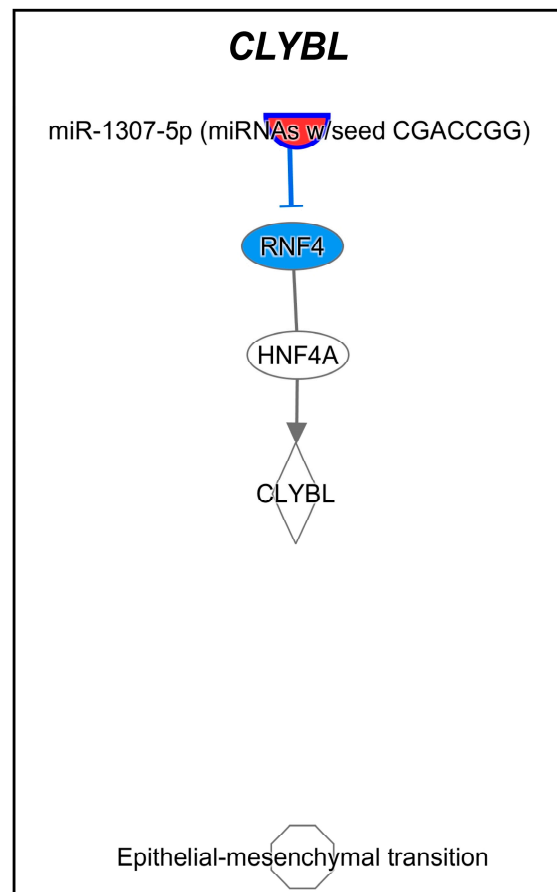

**Figure S4.** Pathway analysis with a functional annotation of the epithelial–mesenchymal transition (EMT) using the Ingenuity Pathway Analysis (IPA) software on miR-1307-5p and the target gene candidates, *ALDH8A1*, *C11orf96*, and *CLYBL*.

**Table 1.** miRNA sequence used for qRT-PCR.

| <b>Gene</b>            | <b>Accession No.</b> | <b>Mature sequence</b>               | <b>Primer sequence</b>               |
|------------------------|----------------------|--------------------------------------|--------------------------------------|
| <i>hsa-miR-106b-5p</i> | MIMAT0000680         | 5'-<br>UAAAGUGCUGACAGUGCAG<br>AU -3' | 5'-<br>TAAAGTGCTGACAGTGCAGAT<br>-3'  |
| <i>hsa-miR-1307-5p</i> | MIMAT0022727         | 5'-<br>UCGACCGGACCUCGACCGGC<br>U-3'  | 5'-<br>TCGACCGGACCTCGACCGGCT<br>-3'  |
| <i>hsa-miR-340-5p</i>  | MIMAT0004692         | 5'-<br>UUAUAAAGCAAUGAGACUG<br>AUU-3' | 5'-<br>TTATAAAGCAATGAGACTGAT<br>T-3' |
| <i>hsa-miR-1228-3p</i> | MIMAT0005583         | 5'-<br>UCACACCUGCCUCGCCCCC<br>-3'    | 5'-<br>TCACACCTGCCTCGCCCCC-3'        |
